# Supplementary material for: Risk perception towards healthcare waste among community people in Kathmandu, Nepal
Source: PLoS One. 2020 Mar 30;15(3):e0230960. doi: 10.1371/journal.pone.0230960 (PMC7105151; doi:10.1371/journal.pone.0230960)
Supplement: S1 Data — (XLSX) [file pone.0230960.s001.xlsx]

## Sheet: Sheet1
Form_No	Age	Sex	Ethnicity	Education	M_status	Religion	Occupation	RE_OCCupation	Year_Residence	Hospital_type	Q10	Q11_1	Q11_2	Q11_3	Q12	Q13_1	Q13_2	Q13_3	Q13_4	Q14_1	Q14_2	Q14_3	Q15	Q16	Q17	Q18_1	Q18_2	Q19	Q20_1	Q20_2	Q20_3	Q21	Q22	Q23	Q24	Q25	Q26	Q27	Q28	Q29	Q30	Q31	Q32	Q33	Q34	Q35	Q36	Q37	Q38
1	28	1	2	3	1	2	2		17	1	1	1			1	4	2	3		99			1	1	1	1		2	1			1	2	2	3	3	4	3	4	1	3	2	2	5	1	3	1	1	1
2	25	1	2	4	1	1	2		15	1	1	2			1	1	2	4		1			1	2	1	3		1				1	2	4	3	3	3	2	2	2	1	1	2	4	1	1	1	2	1
3	57	1	5	4	2	1	2		20	1	1	3	2		1	1	4			1	2	3	1	2	1	1		1				1	2	4	3	4	4	3	5	1	1	2	4	4	1	1	1	1	2
4	58	1	6	2	2	1	8		22	1	1	1	2	3	2					99			1	1	1	2		1				1	3	3	3	3	3	3	5	1	1	1	3	1	2	2	1	2	2
5	32	2	5	3	2	1	2		10	1	1	3			2					99			1	1	1	1		2	1			1	3	3	3	3	3	3	5	3	4	4	1	4	1	2	1	1	4
6	31	1	2	3	1	2	1		10	1	1	1	2		1	4	2			99			2		2	1		1				1	3	3	3	3	4	3	4	4	1	4	2	5	1	3	1	1	2
7	23	2	6	4	2	1	2		3	1	1	1	2		1	1	4	5		1	3		1	2	1	1	3	2	3	1		1	3	4	2	3	3	2	4	2	2	2	3	5	1	1	1	1	2
8	51	1	6	5	2	1	2		50	1	1	1	2		1	2	4	1		3			1	2	1	2		2	1			1	3	2	3	3	3	3	4	1	1	1	3	5	1	3	1	2	2
9	40	1	2	3	1	5	1		40	1	1	2	1	4	1	4	1			99			1	2	2	1		2	1	4		1	5	3	3	4	3	3	1	2	1	4	2	1	1	1	2	3	4
10	23	1	6	5	2	1	1		30	1	1	1	2		1	4	2			1	2		1	2	1	2		2	1			1	4	3	3	4	4	3	4	1	1	2	4	4	1	2	2	3	5
11	30	2	6	3	2	1	6		6	1	1	2			1	4	2			3			1	1	1	3		2	1			1	2	2	2	2	3	2	1	1	1	2	2	5	2	2	1	1	4
12	45	2	6	3	2	1	1		50	1	1	3			1	1	4	2		3	4		1	2	1	3	1	2	2	3		1	3	3	2	2	2	4	5	1	2	2	1	5	1	1	2	1	5
13	37	2	5	6	2	1	1		8	1	1	2			1	1				1	3		1	1	1	1	3	2	1	2		1	2	2	3	2	3	3	1	1	1	2	4	5	1	1	1	2	5
14	40	1	6	6	2	1	1		40	1	1	2			1	2	3	1		1			1	2	1	2		2	1	2		1	4	4	2	3	4	3	2	1	1	1	4	5	1	1	1	1	2
15	18	1	6	3	1	1	7		1	1	1	1	2		1	1	2	5		3			1	2	1	1		2	3	1		1	3	3	3	5	3	3	1	1	2	2	2	5	1	2	2	1	2
16	25	2	2	3	1	1	1		10	1	1	2	1	4	1	3	4	1		3	1	5	2		1	2		2	3	1		1	4	3	3	3	3	3	2	1	1	1	3	5	2	1	3	2	4
17	20	2	6	5	1	1	7		15	1	1	2	1		1	4	5			3	1		1	2	99	1		2	1			1	3	3	2	4	3	3	1	1	1	2	2	5	1	2	2	2	5
18	25	2	6	4	2	1	6		8	1	1	2	4		1	4	1			3			1	2	1	2		2	2	1		1	2	2	3	2	3	3	5	2	1	2	2	5	1	2	2	3	5
19	20	1	2	4	1	2	7		12	1	1	2			1	4	1			1			1	2	1	2		2	2			1	5	5	3	3	3	3	2	1	1	1	2	5	1	1	1	2	5
20	42	2	6	3	2	1	4		16	1	1	2	1	4	1	1	2	4		3	1		1	2	1	2		2	1	3		1	2	1	3	2	3	3	2	1	1	1	4	5	1	2	2	1	5
21	40	1	5	6	2	1	1		40	1	1	2	1	4	1	4	3			3	4		1	2	99	1	3	2	1			1	4	3	3	3	4	4	4	1	1	2	3	4	1	1	1	2	2
22	45	2	5	1	2	1	6		50	1	1	2	1		1	2	3			3	6		1	2	1	1	3	2	1	2		1	3	2	2	2	3	3	1	1	2	1	3	5	2	1	1	3	5
23	33	2	6	5	2	1	6		5	1	1	1	2		1	4	1	3		1	3		1	2	2	2	1	2	1	3		1	4	5	3	4	3	3	4	1	2	4	3	4	1	2	2	2	2
24	39	2	6	3	2	1	6		16	1	1	1	2		1	3	1			3	1		1	2	1	1	3	2	1	2		1	3	4	3	2	3	2	4	1	1	2	5	5	1	4	3	3	2
25	46	2	5	1	2	1	6		12	1	99	99			99					99			99	99	99	1		1				99	3	3	3	3	3	3	2	3	2	3	3	3	2	3	2	3	3
26	45	1	5	3	2	1	2		22	1	1	4	2		1	4	1			3	1		1	2	1	2		2	1	3		1	4	3	4	3	2	2	5	1	1	1	3	1	1	2	1	2	3
27	30	1	2	3	2	1	2		2	1	1	2	1		1	4	1			7	3		1	1	99	1	3	1				1	2	2	3	2	4	2	1	2	1	2	4	5	1	2	2	2	5
28	57	1	2	1	2	2	2		2	1	1	2	1	4	1	1	3			1	3	7	2		99	1		1				99	2	4	3	3	4	3	4	2	1	3	3	4	2	2	1	2	3
29	40	1	2	4	2	2	1		15	1	1	2	1		1	2	3	4	1	7	3		1	1	1	2		2	3	2		1	2	2	3	3	4	3	4	1	3	3	2	5	1	3	1	1	1
30	34	1	5	3	2	3	2		14	1	1	2	1		1	4	5	1	3	6	3		1	2	1	1		2	2	1		1	3	3	3	3	3	3	1	1	1	2	2	4	2	2	1	2	4
31	29	2	2	3	2	2	2		13	1	1	2	1		1	2	4	1		1	3		1	2	99	2	3	2	1			1	2	3	4	3	2	3	4	1	2	2	4	4	2	1	1	4	5
32	21	2	2	4	2	2	6		21	1	1	2	1		1	1	4			3			1	1	1	3		2	3	2	1	1	3	2	2	3	2	3	4	3	2	4	2	4	1	2	2	4	3
33	65	2	2	1	2	2	6		20	1	99				99					99			1	2	99	1		1				99	3	3	3	2	3	3	2	3	2	4	3	4	3	3	2	3	3
34	40	1	5	3	2	1	6		25	1	1	1	2		2					99			99	99	99	1		1				99	3	3	3	3	3	3	2	2	1	3	3	3	2	3	2	3	3
35	40	2	6	3	2	1	2		38	1	1	4	2		1	3				1	2		1	2	1	3		2	1			1	3	3	2	3	3	3	1	1	2	2	4	5	2	2	1	2	5
36	46	2	6	3	2	1	4		15	1	1	4	2	1	1	4	2			4	1		1	2	1	1	2	2	2	3		1	3	3	3	3	4	3	4	4	1	4	2	5	1	3	1	1	2
37	40	1	5	4	2	1	5		4	1	1	1	2		1	4	5	1		3	1		99	99	99	1	4	2	3	1		1	2	3	2	3	3	2	2	1	2	1	1	5	1	3	2	4	2
38	43	2	2	1	3	1	6		10	1	99	99			99					99			99	99	99	1		99				99	2	3	2	3	3	2	3	3	2	3	3	4	2	3	3	3	3
39	55	2	6	1	2	1	6		9	1	1	1	2		1	3	5			3			1	2	1	3		2	2	3		1	2	4	4	4	4	4	4	1	1	1	5	5	1	2	1	1	3
40	46	2	6	2	2	1	4		7	1	1	2	4	3	1	1	4	2	3	3			1	2	1	3	4	2	1			1	3	3	2	2	2	3	4	1	2	2	4	5	2	2	2	2	4
41	35	2	5	3	2	1	3		10	1	1	2	1		1	5	1	4		6	1	3	1	2	1	1		2	1			1	2	3	2	2	3	2	1	1	2	1	4	4	1	1	1	2	4
42	32	1	5	4	1	1	2		3	1	1	3	2	1	1	1	4			1	3	2	1	2	1	1		1				1	5	4	3	4	4	3	5	1	1	2	4	4	1	1	1	1	2
43	60	1	6	2	2	1	1		9	1	1	1	2		1	3	5			3			1	3	1	3		2	1	2		1	2	4	4	4	4	4	4	1	1	1	5	5	1	2	1	1	3
44	27	2	6	6	2	1	6		5	1	1	3	1	2	1	4	5	1	3	1	3		1	2	1	2		2	2	1		1	3	3	3	3	3	3	4	1	2	2	5	4	1	3	2	2	3
45	25	2	5	4	2	1	6		3	1	1	2	1		1	4	3	1		3	1		1	2	99	2	3	2	1			1	3	2	3	2	3	3	4	1	2	2	2	4	2	2	2	2	4
46	40	2	6	3	2	1	2		10	1	1	1	2		1	2	4	3		3	1		1	2	1	1	3	2	2	3		1	3	4	2	2	3	3	2	2	2	2	2	4	2	2	2	2	4
47	55	2	6	1	2	1	6		8	1	1	1	2		1	3	2	5		3			1	2	1	3		2	1	2	3	1	2	4	4	4	4	4	4	1	1	1	5	5	1	2	1	1	3
48	31	2	5	4	2	1	6		50	1	1	3	2		1	2	1			3	1		1	2	1	3		2	1			1	2	3	3	2	3	2	5	1	2	1	2	5	2	1	1	1	1
49	40	2	2	1	5	1	1		12	1	99	99			99					99			99	99	99	1		2	1			99	2	3	2	3	3	2	3	3	2	3	3	4	2	3	3	3	3
50	26	2	5	3	2	1	6		4	1	1	2	1		1	4	3	5		1	3		1	1	1	1	3	2	1			1	2	2	2	2	4	2	4	1	1	2	4	4	1	2	1	3	4
51	35	2	6	2	2	3	6		8	1	1	2	4		1	2	3	1		3	1		1	2	1	2		2	2	1		1	3	2	4	2	4	3	1	1	2	1	5	5	1	2	1	1	5
52	39	2	6	4	2	1	6		21	1	1	2	3		1	1	4			1	3		1	2	1	3		2	1	3		1	4	3	3	2	3	4	2	1	2	1	3	2	1	2	1	2	3
53	19	1	5	4	1	1	7		20	1	1	2	1		1	4	5	1		1	3		1	2	1	2		2	1	3		1	3	2	3	2	2	4	5	1	1	4	2	5	1	1	1	2	5
54	27	2	2	3	2	1	6		15	1	1	2	1		1	4	5	1		1	3		1	2	1	1	2	2	1	3		1	3	3	3	3	2	2	1	1	1	2	5	5	1	2	1	1	4
55	36	1	5	4	2	1	3		4	1	1	1	2		1	4	5	1		3	1		99	99	99	1	4	2	3	1		1	2	3	2	3	3	2	2	1	2	1	1	5	1	3	2	4	2
56	27	2	5	4	2	1	6		26	1	1	1	2		1	4	1			1	3		1	2	1	1		2	3	1		1	3	3	2	2	3	3	1	1	2	2	4	4	1	1	2	1	2
57	65	1	6	4	2	1	8		15	1	1	2	3		1	3	1			4			1	2	1	2		2	2	1		1	3	2	3	3	3	2	4	1	1	1	4	5	1	1	1	1	5
58	48	2	2	1	2	1	6		10	1	99	99			99					99			2		2	1		1				99	4	4	3	3	3	3	2	2	2	3	3	4	2	3	2	3	3
59	42	1	2	1	2	1	8		23	1	99	99			99					99			99	99	99	2		1				99	3	3	3	3	3	3	1	3	3	2	3	2	2	3	2	3	3
60	50	1	5	4	2	1	3		50	1	1	1			1	4	3			3			1	2	1	2	3	2	1	3		1	4	4	4	4	3	4	1	2	2	1	2	5	1	1	1	1	5
61	38	1	6	3	2	1	8		33	1	1	2	1		1	5	4			3	1		1	2	1	1		2	1			1	3	3	3	3	3	3	4	1	2	2	3	4	1	4	2	1	3
62	27	2	5	5	2	1	4		1	1	1	2	3	1	1	3	1			3	4	1	1	2	1	2		2	1	3		1	2	2	2	2	2	2	4	2	2	2	2	5	2	2	2	1	4
63	39	1	6	6	2	1	4		20	1	1	2	3		1	1	2	10	3	3			1	2	1	4	2	2	5	2	1	1	3	3	3	4	3	3	4	1	1	1	1	4	1	1	1	1	4
64	25	2	5	4	2	1	4		7	1	1	3	2	1	1	1	2			1	3		1	2	1	1	2	2	3	1		1	3	2	4	4	3	2	2	2	2	2	2	4	1	1	1	1	4
65	35	2	2	6	2	1	3		7	1	1	2	1		1	1	2	3		3	5	1	1	2	1	2	3	2	1	3		1	3	3	3	2	4	3	2	2	2	2	2	4	2	2	2	2	2
66	32	2	6	6	2	1	4		10	1	1	2	1		1	1	4	3		3	1	5	1	1	1	1	3	2	2	1		1	3	4	2	2	3	3	4	2	1	2	2	5	1	2	2	2	4
67	54	1	6	5	2	1	4		25	1	1	4	1	2	1	4	2			1	3		1	2	2	4		2	2	1		1	2	3	2	2	3	3	5	1	1	2	4	5	1	2	1	1	4
68	60	2	6	1	2	1	2		46	1	1	4	2		1	3	1			3			1	2	1	3		2	1			1	3	2	4	3	3	3	1	1	2	1	4	4	2	2	1	2	4
69	25	2	6	6	2	1	7		21	1	1	2	3	1	1	4	2			1	3		1	2	1	1		2	3	1		1	3	4	3	3	3	3	4	1	2	1	4	5	1	1	2	2	5
70	45	1	6	1	2	1	2		22	1	1	1	2		99					99			99	99	99	2		99	99			1	2	3	3	3	3	3	3	3	1	1	3	5	1	2	3	2	3
71	29	2	5	3	2	1	2		6	1	1	2	1		1	1	4			3	1	2	1	1	1	1		2	1			1	2	2	2	2	2	2	4	2	2	2	4	4	2	2	2	2	2
72	46	2	1	2	2	1	6		5	1	1	2	3		1	2	4	1		3	1		1	1	1	2	3	2	2	3		1	3	4	3	3	3	2	1	1	2	2	2	5	2	2	1	2	4
73	40	2	6	1	2	1	6		7	1	99	99			99					99			1	2	99	3		2	1			99	3	2	2	2	3	3	2	1	2	1	4	5	2	3	2	2	4
74	22	1	6	4	2	1	2		7	1	1	3	1	2	1	8	1	4	3	7	3		1	2	1	2	3	2	1	2		1	4	3	3	3	3	4	2	1	2	2	5	5	2	2	2	2	4
75	19	2	6	4	2	1	7		1	1	1	2	1		99					99			1	2	1	1		1				1	3	3	3	3	3	3	3	2	2	2	3	4	2	2	2	2	4
76	32	1	2	3	2	1	2		4	1	1	2	1		1	4	1			3			1	2	1	3		2	3	1		1	3	3	3	3	3	3	3	2	2	2	2	4	2	2	2	2	4
77	28	2	6	3	2	1	3		8	1	1	2	4		1	2	3	1		3			1	2	1	3		2	1			1	3	3	3	3	3	3	4	1	2	2	3	2	2	3	2	2	3
78	32	1	2	2	3	1	3		2	1	1	3	1	2	1	1	2	4	3	3			1	2	99	2		2	1	2		1	3	2	3	3	3	3	3	2	2	4	3	4	2	3	4	3	3
79	20	1	2	3	1	1	2		1	1	1	2			1	4	1			6	3	7	1	1	1	3		2	1			1	2	3	3	3	3	3	2	2	2	4	2	4	2	3	2	3	3
80	36	1	2	6	2	2	2		15	1	1	3	2		1	2	1			1	6		1	1	2	2	4	2	2	1		1	3	3	3	3	4	4	4	1	1	1	2	5	1	2	2	1	2
81	41	1	6	6	2	1	2		6	1	1	2			1	1	2			3	1	4	1	2	1	2	3	2	1	2		1	3	4	2	4	3	3	4	2	2	2	2	5	1	2	1	2	4
82	37	1	2	3	2	1	2		6	1	1	2	1		99					99		1	2		1	2		2	4			1	3	2	2	3	3	3	2	1	2	2	2	5	1	2	2	2	2
83	38	1	6	6	2	1	3		5	1	1	2	3		1	2	3			3			1	3	1	1		2	2	1		1	3	4	4	3	3	3	4	1	2	4	1	5	1	2	1	2	4
84	33	2	6	6	2	1	2		6	1	1	2			1	2	4			3			1	2	1	2		2	2	1		1	4	3	3	4	4	4	4	2	1	1	2	4	1	2	2	2	4
85	38	2	2	1	5	1	3		10	1	1	1			99					99			99	99	99	2		1				1	3	4	3	3	3	3	4	2	2	2	4	4	2	3	2	3	3
86	50	1	2	5	2	5	2		50	1	1	2	1	4	1	1	7	3		7	3		1	2	1	2		2	2	1		1	3	4	4	4	3	4	1	1	1	2	2	5	1	2	1	1	2
87	36	2	6	3	2	1	6		14	1	1	2	1		1	2	4	5		3	1		1	1	1	2		2	3			1	3	3	3	3	3	3	2	2	2	2	2	4	2	2	2	2	2
88	57	1	6	4	2	1	3		6	1	1	2	1		1	2	1			3			1	2	1	2		2	2	1		1	3	4	3	3	3	3	1	1	2	2	2	5	2	2	2	1	3
89	48	2	6	1	2	1	2		7	1	1	2	1		1	1	3	5		3			1	2	1	2		2	2	1		1	2	3	3	3	3	3	1	2	2	2	4	5	1	2	1	2	4
90	25	2	6	6	2	1	6		7	1	1	2			1	4	2			6			1	2	1	2		2	1	2		1	2	2	3	3	3	3	2	1	2	2	3	5	2	2	2	2	2
91	40	1	6	4	2	1	2		8	1	1	2	1		1	4	1	3		1	3		1	4	1	1	3	2	1			1	5	3	4	2	4	4	4	1	2	1	3	4	1	2	2	2	3
92	28	2	6	3	2	1	2		10	1	1	1	2		1	4	1			3	1		1	1	1	1	3	2	2	1		1	4	4	4	3	3	4	2	2	2	2	4	4	2	2	2	3	4
93	58	1	5	1	2	1	8		2	1	99	99			99					99			99	99	2	1		1				99	2	2	3	3	3	3	3	2	2	3	3	3	2	3	2	3	3
94	26	1	2	3	1	1	7		1	1	1	1	3	2	1	4	1	3		1	3		1	2	1	3	1	2	1			1	5	3	4	2	4	4	4	1	2	1	3	4	1	2	2	2	3
95	30	2	2	3	2	3	6		10	1	1	2	1		1	2	3	1		3	1		1	1	1	1	2	2	4	2	1	1	4	4	3	3	4	3	2	1	2	2	2	4	1	2	2	2	2
96	40	2	2	2	2	1	6		13	1	1	2			1	4	3	2		8	1		99	99	99	1		1				99	2	3	3	3	3	2	2	3	2	2	3	3	2	2	1	4	4
97	30	2	3	4	2	1	2		14	1	1	3	2	1	1	3	2	4		3			1	2	1	3		2	5	1	3	1	3	3	4	3	3	3	1	2	1	1	5	5	2	2	2	2	4
98	53	1	1	1	2	1	8		10	1	99	99			99					99			99	99	99	1		1				99	3	4	3	3	3	4	2	3	2	3	3	2	2	3	2	4	2
99	45	1	1	2	2	1	2		10	1	1	1	2		1	4	3			3			1	2	1	3	1	2	4	5	3	1	3	4	4	3	4	3	1	2	1	1	5	1	2	1	1	2	2
100	54	2	2	1	2	1	6		13	1	1	2			1	3	1	4		3			1	2	1	3		2	2	1		1	3	2	4	4	3	3	1	2	1	2	4	4	2	2	2	2	4
101	35	2	2	6	2	2	3		10	1	1	2	1		1	2	3			3	1		1	1	1	4		2	1	3		1	4	4	4	3	4	3	4	1	1	1	2	5	1	1	1	2	5
102	24	2	6	4	2	1	7		1	1	1	2	1		1	2	4	1		4	3	7	1	1	1	1	3	2	1			1	3	4	3	4	4	3	2	2	2	2	4	5	2	2	2	2	4
103	26	2	6	2	2	1	6		10	1	1	3	2		1	4	3	1		3	5	1	1	2	2	4		2	1			1	3	4	3	3	4	3	4	1	2	2	4	5	2	2	3	2	2
104	35	1	2	2	2	2	5		15	1	1	2	1		99					99			1	1	1	1	3	2	3	2	1	1	3	3	4	4	4	3	4	1	1	1	3	4	1	2	1	2	3
105	50	1	2	2	2	2	2		34	1	1	2	1		1	1	3	2		3	1		1	2	1	1		2	1	2	3	1	3	4	3	4	3	4	1	2	1	2	3	5	1	2	1	3	3
106	28	1	5	2	1	1	3		10	1	1	2	1	3	1	4	2	3		3	1		1	3	1	3		2	1	2		1	4	3	3	3	3	4	5	1	1	2	5	5	1	1	1	2	4
107	21	2	6	4	2	1	7		10	1	1	2	1		1	1	2			1	3		1	1	1	1	3	2	1	2		1	3	4	4	3	4	4	4	2	2	2	4	4	2	2	2	2	4
108	40	2	2	1	2	2	5		12	1	1	2	1	4	1	2				1	3		1	2	99	3	4	2	4	2		1	4	4	4	4	4	4	1	1	1	2	4	5	2	3	2	1	5
109	50	1	6	1	2	1	5		12	1	1	3	4	1	1	3	1			3			1	2	1	2	4	2	1	4		1	3	4	3	3	3	3	4	1	2	2	4	5	1	2	1	2	4
110	40	2	2	2	2	1	5		10	1	1	2	1	4	1	3	4			3			99	99	99	2		2	1	3		1	4	3	3	3	3	3	2	2	2	2	4	5	2	3	2	2	3
111	46	2	2	1	2	1	5		11	1	1	2	1	4	1	3	2			3	1		1	3	1	2	3	2	3	2	1	1	3	3	4	4	3	4	2	1	1	1	3	5	1	2	2	1	2
112	26	2	3	2	2	1	5		11	1	1	2	1		1	3	4			3	7	5	1	2	1	3		2	1			1	4	4	4	3	4	3	1	1	2	2	3	5	2	2	2	2	5
113	27	2	1	2	2	1	6		8	1	1	2	1		1	3	4	2		3			1	2	1	1	4	2	1	2		1	3	3	3	3	3	3	1	1	2	1	5	5	1	2	1	2	5
114	24	1	3	1	2	1	5		11	1	1	2	1	4	1	3	2	1		3	1		1	3	1	2		2	1			1	3	4	3	3	3	3	2	1	2	2	5	4	2	1	1	2	5
115	45	2	2	1	2	1	2		10	1	1	4	2		1	3	2	4		1	3		1	2	1	3		2	1			1	3	1	1	3	3	2	4	1	1	2	4	5	1	2	2	1	4
116	50	2	2	1	5	1	5		10	1	1	4	2	1	1	1	2	3		99			1	1	1	3		2	1	2		1	4	4	3	4	3	3	1	2	1	1	5	4	1	5	1	2	4
117	48	1	2	2	2	2	5		15	1	1	1	2		1	3	4			3	1		2		1	1	3	2	3	1	2	1	3	2	2	3	3	3	2	2	1	1	3	4	2	2	1	3	1
118	45	2	5	1	2	1	6		11	1	1	2	4		99					99			99	99	99	2		2	2	1		1	3	3	3	3	3	3	1	2	2	2	4	4	1	3	2	3	3
119	42	2	2	1	4	3	6		8	1	1	4	2	3	1	2	3	4		3			1	2	99	1	2	2	1	2	4	1	3	4	3	3	3	4	1	1	1	1	4	4	1	2	1	2	5
120	30	2	2	1	2	3	6		13	1	1	2	4		1	1	3			3	1		1	2	1	1	3	2	1	2		1	4	3	4	3	3	4	2	1	1	2	3	5	1	2	2	2	3
121	27	1	2	1	2	1	6		11	1	1	2			1	1	4			7	1	4	1	2	1	3		2	2	1		1	3	3	4	4	4	4	2	2	2	2	3	4	2	2	2	2	4
122	32	1	2	2	2	1	5		12	1	1	2	3	1	1	4	1			1	3		1	1	1	2		2	3	1	2	1	4	3	4	4	3	4	1	2	1	2	3	4	1	2	2	1	4
123	34	2	3	2	2	1	5		10	1	1	2			1	5	3			2	3		1	2	1	2	4	2	1	3		1	2	3	4	3	2	3	1	1	1	2	4	4	2	2	2	2	4
124	57	2	2	1	2	1	6		2	1	2				2					99			2		99	1		1				99	3	2	2	3	3	2	3	2	2	3	3	4	2	3	4	3	3
125	23	2	6	4	2	1	6		10	1	1	2	1		1	1	4			3	1	7	1	2	1	2	3	2	1	2		1	4	4	3	3	3	3	1	1	2	2	2	5	2	2	2	1	5
126	57	1	2	2	5	2	8		4	1	99	99			99					99			99	99	99	3		1				99	3	2	3	3	3	2	3	2	3	4	3	2	2	3	4	4	2
127	56	1	2	1	2	1	8		9	1	2				1	3	2			3			99	99	99	1		2	2	5		99	3	4	2	2	3	3	3	2	3	2	3	4	2	3	4	2	3
128	47	1	3	1	2	1	2		24	1	1	4	2		1	2	1	3		3	1		1	2	1	1	3	2	3	1		1	3	3	3	3	3	3	1	1	1	1	2	5	2	2	4	2	4
129	22	2	2	3	2	1	6		10	1	1	2	1		1	4	3			3			2		99	1		2	1	2	3	1	3	3	3	2	3	3	1	2	2	3	3	4	1	2	3	3	2
130	40	2	2	1	2	1	6		12	1	99	99			99					99			99	99	1	2	4	2	1			1	3	3	3	2	3	3	3	2	2	2	3	4	1	2	2	3	3
131	55	2	6	2	2	1	3		10	1	1	2	3	4	1	3	4			3	4	1	1	2	1	3		2	2	1		1	4	5	3	3	4	4	1	1	1	2	5	2	1	2	2	1	5
132	25	2	2	4	2	2	6		13	1	1	2	1		1	2	3	1		3	1		1	2	1	2	3	2	1	2		1	2	3	4	2	3	3	1	2	2	2	4	4	2	2	2	1	2
133	18	1	2	3	1	5	7		10	1	1	2	1		1	3	4	2	1	1	4	3	1	2	1	1	4	2	1			1	3	3	2	2	3	3	4	1	1	2	2	5	2	2	2	2	4
134	30	2	5	3	2	3	2		10	1	1	2	1	4	1	9	4	1	3	3	1		1	2	1	1		2	1	2		1	2	2	3	3	3	3	2	1	2	2	4	4	2	2	2	2	4
135	49	2	2	1	2	1	6		13	1	1	2	1	3	1	3	4	1		3			2		1	1	3	2	1			1	3	4	2	3	3	3	2	2	2	2	4	4	2	2	2	3	3
136	20	1	5	4	1	2	8		20	2	1	2	1	4	1	2	1	4		3			1	2	1	1	3	2	2	1		1	3	4	3	3	3	3	2	2	2	2	4	4	1	2	2	1	4
137	35	2	6	4	2	1	6		25	2	1	1	2	3	1	1	4			3			1	2	1	3		2	3	2	1	1	3	4	3	3	3	3	4	2	2	2	3	4	2	2	2	2	4
138	36	1	6	4	2	1	2		7	2	1	2	1		1	2				2			1	1	1	2	3	2	1			1	3	4	3	3	3	3	4	1	1	2	3	5	2	2	2	2	3
139	38	2	2	3	2	1	2		2	2	1	2	3		1	2	1			3			1	3	1	1	3	2	1			1	3	3	3	3	3	3	2	1	2	2	4	5	2	2	2	2	2
140	57	2	5	1	2	1	6		20	2	1	4	3	2	1	4	2			99			1	2	1	1		1				1	2	2	3	3	3	3	1	1	2	2	3	4	2	2	2	3	4
141	46	2	6	4	2	1	6		10	2	1	4	2		1	4	2			1			1	2	1	3		2	3	1		1	2	3	3	4	3	3	1	2	2	2	3	3	5	2	2	2	2
142	33	2	2	3	2	1	2		10	2	1	2	1		1	1	4	2		1			1	2	99	1	2	2	1	3		1	2	2	3	3	3	3	2	1	2	2	3	4	2	3	2	2	4
143	18	2	6	3	1	1	7		2	2	1	1			1	5				99			1	1	1	2		2	1			1	3	4	3	3	3	3	1	2	2	2	3	4	2	2	2	3	2
144	68	1	6	6	2	1	3		22	2	1	2			1	4	3			1			1	2	1	1	4	2	2	1		1	2	3	3	3	3	3	4	1	1	1	2	5	2	2	1	2	4
145	45	2	6	3	2	1	3		30	2	1	4	2	1	1	2	1	5	4	3			1	3	1	2	3	2	3	2	1	1	3	4	3	3	3	4	4	2	1	2	4	5	2	2	1	3	4
146	44	2	6	6	2	1	3		25	2	1	2			1	2	4			3	6		1	2	1	1	2	2	1	2		1	2	3	3	3	3	3	2	1	1	2	2	5	1	2	1	2	4
147	44	2	6	3	2	1	6		20	2	1	2			99					99			1	2	99	2		2	1			1	2	4	3	3	3	3	2	1	1	1	4	4	1	3	2	2	3
148	34	2	5	4	2	2	2		7	2	1	2			1	2	1			99			1	2	1	2		2	3	2	1	1	3	3	3	3	3	3	1	1	1	1	3	5	1	2	1	1	4
149	18	2	2	3	1	2	7		4	2	1	2	1		2					99			99	99	1	2		99				1	3	3	2	2	3	3	4	2	2	2	3	4	2	2	4	3	2
150	28	2	1	5	2	1	3		2	2	1	2	3		1	2	1	4		1			1	2	2	2	3	2	6			1	2	3	3	3	2	3	2	1	1	2	2	4	1	3	2	1	3
151	50	1	1	1	2	1	2		5	2	1	2	1		99					99			99	99	99	1	2	2	1			1	3	4	3	3	3	3	2	2	2	2	3	4	2	2	2	3	4
152	29	2	2	4	2	2	2		5	2	1	2	1	3	2					99			1	2	1	2		2	1	2		1	3	3	3	3	3	3	2	2	2	2	4	4	2	2	2	2	3
153	30	2	6	6	2	1	3		7	2	1	1	2		1	2	1			3			1	3	1	2	3	2	1	2		1	3	4	3	4	3	4	1	1	2	2	4	5	1	2	1	1	3
154	28	2	5	4	1	1	7		6	2	1	1			1	4	1			1	3		1	1	1	3		2	2	1		1	2	2	3	2	2	2	4	2	2	2	4	4	2	2	2	2	4
155	57	2	2	2	2	2	6		15	2	99	99			99					99			99	99	99	1		1				99	3	4	3	3	3	3	3	2	2	3	3	4	2	3	2	3	3
156	45	2	5	4	2	1	6		12	2	1	2	1	4	1	2	3			3			1	3	1	2		2	3	1	4	1	3	4	3	3	3	4	2	2	2	1	5	4	2	2	2	2	4
157	50	2	5	2	2	3	6		13	2	1	2	1		1	1				3			1	2	1	2	3	2	2	1		1	3	4	3	3	3	3	1	1	2	2	3	4	2	2	2	2	4
158	53	1	6	3	2	1	3		50	2	1	1	4	2	1	2	4	3		3			1	2	1	1	2	2	2			1	3	4	3	3	3	4	4	2	2	1	2	5	1	1	2	2	4
159	40	2	6	1	2	1	6		3	2	1	1	2		1	1	4	2		1	3		1	3	99	1	3	1				99	2	2	3	2	2	3	3	2	1	2	1	3	4	2	2	2	2
160	29	2	5	4	2	1	1		50	2	1	2	1		1	4	2			3			1	1	1	2	3	2	1			1	2	3	2	3	3	3	4	2	1	2	3	4	2	2	2	1	4
161	40	2	6	3	2	1	6		10	2	1	4	2	1	1	3	2			3			1	2	1	2		2	2	1		1	2	3	2	2	2	3	1	1	2	2	4	4	2	3	2	3	3
162	32	2	6	2	2	1	2		9	2	1	1			1	2	4	3		1	3		1	2	1	1		2	1	2	3	1	3	4	3	3	3	3	2	2	2	2	4	4	2	2	2	2	4
163	61	1	3	6	2	1	4		7	2	1	4	1		1	2	3			2	3		1	2	1	2	3	2	2	1		1	3	4	2	3	3	4	4	1	1	2	5	5	2	2	1	1	4
164	37	2	6	4	2	1	6		35	2	1	2	1		1	4	2			3			1	1	1	3		2	2	1		1	2	4	3	4	3	3	5	1	1	2	1	5	1	2	1	1	5
165	33	2	6	6	2	1	3		6	2	1	2	1		1	2	4	1		1	3		1	1	1	3	2	2	1			1	3	3	3	3	3	3	4	1	1	1	4	5	1	2	2	1	4
166	52	2	2	2	2	1	4		7	2	1	1	3		1	4	1			3	1		1	2	1	1	3	2	1	2		1	3	4	3	3	3	3	4	1	1	1	4	5	1	2	2	1	4
167	26	2	6	3	2	1	6		5	2	1	1	2	3	1	1	5	3		3			2		99	1		1				99	4	3	3	3	3	3	3	2	2	4	2	4	2	3	2	3	3
168	28	1	5	6	1	1	8		6	2	1	1	2		1	4	2	1		1	3		1	2	1	2	4	2	2	1	3	1	3	3	3	3	3	3	4	1	1	2	4	5	2	2	1	1	4
169	22	2	5	4	2	1	7		1	2	1	2	1		1	5	3	2		3	1		2		99	3		2	1	2		1	1	2	3	2	1	2	4	2	1	1	2	5	1	2	2	3	2
170	22	2	6	4	1	1	7		25	2	1	2	3		1	4	5			1	2	3	1	2	1	1	2	2	2			1	2	3	4	4	3	3	1	1	1	1	2	5	1	1	1	1	4
171	49	1	6	6	2	1	3		25	2	1	3	2	1	1	1	7			3			1	3	1	2		2	2	1	3	1	3	3	4	3	3	4	4	2	1	1	2	4	2	2	1	4	2
172	22	2	6	5	1	1	7		7	2	1	2	1		1	2	1			3			1	2	1	1		2	1	2		1	3	3	3	3	3	3	4	2	2	1	2	5	1	2	1	3	2
173	43	1	5	3	2	1	8		8	2	1	2	1		1	2	3			3			1	2	1	2		2	3	2	1	1	3	4	3	3	3	4	2	2	2	1	5	4	2	2	2	2	4
174	57	2	5	1	2	1	6		6	2	99	99			99					99			99	99	99	1		1				99	3	4	3	3	3	3	3	2	4	4	2	2	2	3	2	3	3
175	25	2	6	6	2	1	2		9	2	1	2	3		1	2	1			3			1	1	1	2	3	2	1	2		1	3	3	3	3	3	3	4	2	2	2	2	4	1	2	2	2	2
176	54	1	5	4	2	1	4		15	2	1	2	3		1	2	1			99			1	2	1	1	2	2	2	1		1	3	4	3	3	3	3	1	2	2	2	2	4	2	2	2	2	2
177	25	1	3	3	2	1	2		12	2	1	2			99					99			1	2	99	2		2	2			1	3	3	3	3	3	3	4	2	1	1	4	5	2	2	2	2	3
178	25	2	2	4	2	3	8		5	2	1	1	2		1	4	3			3			1	2	1	2		99				1	2	3	3	3	3	3	4	1	2	2	2	4	2	2	2	2	4
179	47	2	6	4	2	1	6		10	2	1	2	1		1	2	1	4	5	3			1	2	1	1	3	2	3	1		1	3	2	3	2	3	2	4	2	2	2	3	5	1	2	1	2	4
180	45	1	5	6	2	1	6		50	2	1	2	1	3	1	9	1			9			1	2	1	1	2	2	2			1	3	4	3	3	3	4	2	1	4	2	3	3	1	2	2	1	3
181	50	2	6	2	2	1	6		10	2	99	99			99					99			99	99	99	1		99	99			99	3	3	3	3	3	3	3	2	3	3	3	4	2	3	2	3	3
182	40	1	5	6	2	1	2		10	2	1	3	2		1	4	2			1			1	1	1	3	4	2	3	1	6	1	3	3	3	3	4	4	4	1	1	1	4	5	1	1	1	2	2
183	45	1	6	6	2	1	3		13	2	1	3			1	4				99			1	2	1	2	3	2	1	2		1	3	4	4	3	4	3	4	2	2	4	4	5	1	3	1	2	3
184	40	1	6	6	2	1	3		5	2	1	1	2		1	2	4	1		1			1	2	1	2		2	1			1	3	4	3	3	4	3	4	2	1	4	3	4	2	3	1	2	3
185	46	1	6	6	2	1	3		9	2	1	1	2		1	2	4	1		99			1	2	1	1		2	3	2	1	1	3	3	3	3	3	3	2	3	2	2	3	4	2	3	2	3	3
186	32	1	5	6	2	1	4		9	2	1	2			1	2	1			6			1	1	1	1		2	2	3		1	1	1	2	3	2	1	1	2	1	1	2	3	3	3	1	1	3
187	40	2	2	6	2	2	3		3	2	1	2	3		1	3	1			3			1	1	1	2		2	3			1	3	2	3	3	3	3	4	2	1	1	1	5	1	1	1	1	1
188	45	2	6	2	2	1	6		13	2	1	2	1	4	1	4	1			3			1	1	1	1	3	2	1	2		1	3	4	3	3	3	4	1	1	1	1	2	4	1	2	1	1	3
189	28	2	6	4	2	1	6		3	2	1	1	2		1	3	1			3	1		1	2	1	3		2	1	2		1	2	2	3	2	2	2	1	2	2	2	4	4	1	2	2	4	2
190	29	2	6	6	2	1	6		2	2	1	1			2					99			1	1	1	1		2	4	2		1	3	1	3	2	2	3	4	2	1	1	5	1	1	1	2	5	5
191	71	2	6	2	2	1	6		8	2	1	1	2		1	9	4			99			99	99	2	3		1				99	2	3	3	3	3	2	3	2	2	2	2	2	2	3	2	3	2
192	45	2	6	3	2	1	6		9	2	1	1	2	3	1	1	4	3		1	3		1	2	1	1	3	2	2			1	3	3	3	3	3	3	1	1	2	2	4	4	2	2	2	2	4
193	26	2	5	6	2	1	2		15	2	1	2	1		1	1	4			3			1	2	1	1		2	3	1		1	3	3	3	3	3	3	4	2	2	2	2	4	2	2	2	2	2
194	62	2	5	3	5	1	2		9	2	1	1	5		1	4	1			3	1		1	1	1	1	2	2	3	1		1	3	3	4	3	3	3	5	1	1	1	3	5	1	1	1	1	5
195	22	1	6	4	1	1	3		6	2	1	1	2	3	1	1	4			3			1	2	1	4		2	3	1	5	1	3	3	3	3	3	3	4	1	2	1	2	5	1	2	2	2	2
196	39	1	6	6	2	1	2		25	2	1	2	1		1	4	1			2	6		1	1	1	2	3	2	2	1		1	4	3	3	4	4	4	2	1	1	1	3	5	1	1	1	1	2
197	40	2	5	3	2	2	6		8	2	1	2	1		1	2	1	3	5	3			1	2	1	2	3	2	3	2	1	1	2	3	3	3	3	3	1	1	1	1	2	4	1	2	1	2	3
198	32	2	2	5	2	1	3		4	2	1	2	1		1	4	3			1	3		1	2	1	4		2	2			1	3	4	3	4	3	3	1	2	4	2	3	4	2	1	2	1	4
199	36	2	2	3	2	1	6		1	2	1	1	2		1	4				9			1	2	1	2		1				1	3	3	3	2	3	2	2	2	2	2	4	5	2	2	2	2	4
200	61	1	5	5	2	1	4		1	2	1	4	2		1	1	4	3		3	1		1	2	2	3		2	1	2		1	3	3	3	3	3	3	1	1	1	1	5	4	1	3	2	1	2
201	36	2	6	6	2	1	6		5	2	1	1	2		1	4				3	1		1	2	1	2		2	1	2		1	3	3	3	3	3	3	4	2	2	2	3	4	1	2	2	2	3
202	46	2	6	6	2	1	6		13	2	1	1	2		1	1	4	3		1	3		1	2	1	1	2	2	1	2	3	1	2	3	3	4	3	3	4	1	1	2	3	5	2	2	2	1	2
203	76	1	5	6	2	1	4		4	2	1	2	3		1	2	1			3	7		99	99	99	3		2	1	2		1	3	3	3	3	3	3	1	2	2	2	2	5	1	2	1	1	2
204	24	2	6	6	2	1	3		7	2	1	2	3		1	1	3			99			1	1	1	2		99	99			1	3	4	3	3	3	4	4	2	2	2	4	4	2	2	2	2	4
205	23	1	6	6	1	1	7		5	2	1	2			2					99			2		1	1		99				1	3	3	4	4	3	5	4	2	2	2	3	4	2	2	2	4	4
206	24	1	3	3	2	1	7		5	2	2				2					99			1	2	1	1		1				1	1	2	1	2	1	2	1	1	1	2	1	2	1	1	1	1	2
207	49	1	5	3	2	1	4		50	2	1	2	1		99					99			1	2	1	2		2	3			1	3	2	1	2	4	4	4	3	1	1	3	5	1	2	1	3	3
208	30	1	6	6	1	1	1		10	2	1	2	3		2					6			1	1	1	3		99				1	3	3	4	4	4	4	2	1	1	2	1	5	1	3	1	1	2
209	33	2	6	3	2	1	2		1	2	1	2			99					99			99	99	99	3		99				1	2	3	3	3	3	3	2	2	3	3	3	4	2	3	2	3	4
210	21	1	3	4	1	1	7		5	2	1	2	3		1	2	4	3		1	4		1	2	1	3		2	3			1	2	2	2	2	2	2	3	1	1	1	1	1	1	2	1	1	4
211	22	1	3	4	1	1	7		4	2	1	2	3		2					99			1	2	1	2		1				1	3	4	3	3	3	3	2	2	2	2	4	5	1	1	1	2	5
212	42	1	6	3	2	1	8		3	2	1	4	2		99					6	3		1	1	99	3		99				1	2	2	3	3	3	3	2	2	1	2	4	4	2	3	2	3	2
213	24	1	6	4	1	1	7		4	2	1	2	3		1	4	3			1	3		1	3	1	4		2	1	2		1	3	3	2	3	3	2	3	2	1	1	3	4	1	1	1	1	5
214	47	1	3	6	2	1	3		15	2	1	2	3	1	1	1	2	4	7	3	4	1	1	2	1	2	4	2	2	1		1	3	4	4	3	5	5	5	1	2	1	5	5	1	2	1	1	1
215	29	1	6	6	1	1	8		7	2	1	1	2		2					99			99	99	99	2		99				99	3	4	3	3	4	3	2	3	2	2	3	4	2	3	2	3	3
216	35	2	2	5	2	1	6		12	2	1	2	1		99					99			1	1	1	1		2	1			1	3	3	3	3	3	3	1	2	2	2	3	5	2	2	2	1	3
217	27	2	6	6	2	3	6		10	2	1	2	1		1	2	1	3		3			1	1	1	3	4	2	2	1		1	3	3	4	3	3	3	1	1	1	1	3	5	1	1	2	1	5
218	23	2	6	4	1	1	7		5	2	1	1	2	3	1	4	3	5		3			1	2	1	1	3	2	1	2		1	3	3	2	3	2	3	2	1	1	2	2	4	1	1	1	4	4
219	55	1	5	2	2	2	8		1	2	99	99			99					99			99	99	99	2		2	1			99	3	3	3	3	3	3	1	1	2	1	4	5	1	2	1	2	4
220	55	1	5	6	2	1	2		15	2	1	1	2		2					99			2		1	3		1				1	2	2	2	2	2	2	2	2	2	2	2	4	2	2	2	2	4
221	32	2	6	3	2	1	6		1	2	1	1	2		1	1	4			3	1		1	2	1	3		2	1	2		99	2	2	2	3	3	4	4	1	2	4	4	4	2	2	2	2	2
222	32	1	6	4	2	1	2		4	2	1	1	2		2					99			99	99	99	1		1				99	3	3	3	3	3	3	4	3	1	2	3	4	1	2	2	3	2
223	45	2	6	6	2	1	2		10	2	1	3	1	2	1	3	4			3			1	1	1	4		2	1	2	3	1	3	4	3	3	3	3	1	1	2	1	3	5	1	2	1	3	1
224	49	1	6	6	2	1	4		10	2	1	1			1	4	1	5		2	1	3	1	1	1	2	3	2	2	1		1	3	3	3	3	3	3	4	2	2	2	2	4	2	2	2	2	4
225	50	1	6	6	2	1	3		15	2	1	1	2	3	1	1	4	2		1	3		1	2	1	2	3	2	3	5	6	1	3	4	3	4	4	4	2	2	2	2	2	4	2	2	2	2	2
226	24	1	6	4	1	1	7		13	2	1	2	1	3	1	5	2	1	4	4	3	1	1	2	1	2	4	2	2	1	4	1	3	4	4	3	4	3	5	1	1	2	4	5	1	2	1	1	5
227	25	1	2	4	1	1	3		4	2	1	2	3		1	1	5	3	4	1	2		1	2	1	1		2	2	1		1	2	2	3	2	2	3	4	1	1	1	4	4	1	4	1	1	4
228	20	2	5	4	1	1	7		20	2	1	2	3	1	1	1	4	3		1	3		1	2	1	1		2	2	1		1	2	2	3	3	3	2	4	2	2	2	3	4	2	2	1	1	4
229	18	1	6	4	1	1	7		15	2	1	1	2	3	1	2	3	1	4	3			1	1	1	2		2	1			1	2	4	3	3	3	2	4	1	2	1	2	4	2	2	2	1	2
230	37	1	6	4	2	1	3		38	2	1	2	1		1	4	1			3	1		1	3	2	1	3	2	3	2	1	1	3	3	3	3	3	3	1	2	2	2	3	5	1	2	2	1	5
231	43	1	5	2	2	1	2		10	2	1	2	4		1	4	5	1		3	1		99	99	99	1		2	3	1		1	2	3	3	3	3	3	1	1	2	2	4	5	1	2	2	2	4
232	42	1	1	2	2	3	7		5	2	1	2	1		1	3	4	1		3	1		99	99	99	1		2	4	1		1	3	4	3	4	3	4	1	1	2	2	4	1	1	4	2	1	4
233	20	2	2	1	2	1	6		7	2	1	2			1	1	4	3		1			1	2	1	3		2	1			1	2	3	3	3	3	3	4	2	2	1	4	4	2	2	2	2	4
234	29	2	5	3	2	1	2		8	2	1	2	1		99					99			1	1	1	2		2	1	3		1	2	3	2	3	3	3	1	2	3	1	3	4	1	2	2	1	3
235	40	2	6	3	2	1	6		22	2	1	1	3	2	1	3	1	4		3			1	2	1	2		2	1			1	3	3	2	4	3	3	2	1	2	2	2	5	1	2	2	1	2
236	18	2	6	3	1	1	7		14	2	1	2			1	2	1	3		3	1		1	2	1	2		2	1	2		1	3	3	2	2	2	2	4	1	2	1	2	4	2	2	2	2	2
237	25	2	2	2	2	1	6		4	2	2				99					99			99	99	99	2		2	1			99	3	2	2	3	3	3	1	2	2	2	4	4	1	2	1	3	3
238	53	1	6	5	2	1	3		2	2	1	1	2	3	1	1	3	4		3			99	99	99	1		2	1	2		1	3	4	3	3	4	3	3	2	4	2	2	4	2	3	2	3	3
239	19	2	3	4	1	1	7		1	2	1	2	1		1	2	4			1			1	2	1	2		2	1			1	3	4	3	3	3	3	4	1	2	1	2	4	2	2	2	4	4
240	30	2	6	6	2	1	2		3	2	1	1			1	4	1	3	5	3	1		1	2	1	3		2	1	2		1	2	2	2	3	3	4	4	2	2	2	2	4	1	2	1	2	2
241	26	2	5	6	1	1	2		15	2	1	1	2		1	1	4			4	3		2		1	2		2	2	3		1	3	3	4	3	4	4	4	1	4	1	2	5	1	2	2	1	2
242	22	2	6	4	1	1	7		50	2	1	1			1	2	4			99			99	99	1	2		2	3			1	3	2	2	3	3	3	4	3	2	2	3	3	2	2	2	2	2
243	30	1	6	3	2	1	3		7	2	1	2	3	1	1	2	5			3	1		1	2	1	2	4	2	1	2	3	1	3	3	2	3	3	3	4	4	2	2	2	4	2	2	2	3	2
244	34	2	6	4	2	1	2		50	2	1	2	1		1	2	1	4		1	3		1	2	1	2		2	1	2		1	3	3	3	3	3	4	2	1	2	2	3	5	1	2	1	2	4
245	24	1	6	6	1	1	3		20	2	1	2	1		1	2	4			3			1	1	1	1		2	1	2		1	3	4	3	3	4	4	4	2	2	1	2	4	2	2	2	2	3
246	50	1	6	3	2	1	2		15	2	1	5	4		99					99			1	2	1	1		2	1			1	3	4	3	3	4	4	5	1	2	3	3	5	1	1	1	3	2
247	28	2	6	3	2	3	6		8	2	1	2	1		1	2	1	5		3	1		1	2	1	2		2	1			1	2	3	3	2	3	3	4	1	1	2	4	4	1	2	2	1	4
248	28	2	5	2	2	1	6		3	2	1	1			99					99			1	2	99	2		2	1			1	4	3	3	3	3	3	3	2	2	3	3	4	2	3	2	3	3
249	51	1	3	4	2	1	2		14	2	1	2	1	4	1	1	2			1	3		1	2	1	1		2	2	1		1	2	2	2	3	3	3	4	1	1	2	2	4	2	2	2	2	4
250	45	2	5	2	2	1	2		24	2	1	4	2		99					99			1	2	1	2	3	2	1	2		1	3	4	3	3	3	3	1	2	2	1	4	4	2	2	2	2	4
251	42	1	6	5	2	1	2		40	2	1	2	4		1	2	4	1		1	4		1	1	1	1	2	2	1	2		1	3	4	3	4	4	3	1	2	2	2	4	4	2	2	2	2	5
252	23	2	6	6	1	1	7		25	2	1	2	1		1	2	1	3	10	3	1		1	2	1	2		2	2	1		1	3	3	4	4	3	3	1	2	2	1	4	5	1	2	1	1	2
253	30	2	5	3	2	1	6		25	2	1	2	1	4	1	4	2			1	3		1	2	1	3	4	2	2	1		1	2	3	3	2	3	3	4	1	2	1	4	5	1	2	1	2	2
254	41	2	6	3	2	1	3		25	2	1	2	1		1	2	1			3			1	2	1	2	3	2	1	2		1	2	2	2	2	2	2	4	2	1	2	2	4	2	2	2	2	4
255	23	2	1	4	2	1	6		7	2	1	2	3		1	4	3	10		1			1	4	1	2		2	1	2		1	3	3	2	2	3	2	2	2	3	2	2	4	4	2	2	2	3
256	27	2	6	3	1	1	3		7	2	1	4			1	3	2			3	1		1	2	2	3	4	2	3	2	6	1	3	2	2	3	3	3	4	1	1	1	2	2	4	2	4	4	1
257	26	2	6	3	2	1	6		7	2	1	2			1	4				3	1		1	1	1	3		2	2	1		1	3	3	3	3	3	3	4	2	2	2	4	4	2	2	2	2	4
258	19	1	6	4	1	1	7		8	2	1	2	3		1	5	2	1		1			1	1	1	2	4	2	3	2	1	1	3	2	2	3	4	2	4	2	2	2	4	4	2	2	2	2	2
259	25	2	2	4	1	2	7		2	2	1	2	3		1	2	1			4	1		1	2	1	2		2	2			1	2	3	2	3	2	3	2	3	2	2	3	4	2	2	2	2	4
260	22	2	6	3	1	1	7		2	2	1	2	3		99					99			1	1	1	1		2	2			1	2	2	2	2	2	2	3	2	2	2	4	4	2	2	2	3	4
261	18	2	3	3	1	1	7		25	2	1	2	1		1	3	2			3	1		1	2	1	2	3	2	3	2		1	3	3	3	3	3	3	4	2	2	2	4	4	2	3	2	2	4
262	29	1	6	4	1	1	7		2	2	1	1	2	3	1	1	3			1	5		1	2	1	2		2	2	1		1	2	3	2	3	3	3	4	2	2	2	3	4	2	2	2	2	2
263	26	2	2	3	2	1	1		15	2	1	2	1		1	1	2			3			1	2	2	2		2	3	2		1	3	3	1	3	2	2	1	1	1	2	4	2	1	2	1	1	2
264	20	1	5	4	1	1	7		50	2	1	1	2	4	1	3	1	4		3			1	2	1	1		2	2			1	4	3	3	3	3	3	4	2	1	2	4	4	1	2	2	2	4
265	32	2	2	6	2	1	6		50	2	1	2	1	4	1	4	2	3		3	1		1	1	1	3	4	2	2	1		1	2	2	3	2	3	3	2	1	1	1	3	5	1	2	1	1	5
266	22	1	6	3	1	1	7		1	2	1	1	2		1	1	5			6	2	3	1	2	1	2		2	1	2	4	1	3	2	3	3	2	2	1	1	2	2	4	4	1	1	1	3	4
267	31	2	6	4	2	3	3		2	2	1	2	3	1	1	2	1	4	3	1	4		1	2	1	3	4	2	2	1		1	2	3	3	3	2	2	4	1	2	1	2	5	1	1	1	3	5
268	34	2	6	2	2	1	6		5	2	1	1	4	2	1	1	4	3		3	6		1	2	99	2		2	5	6	2	1	3	3	3	3	3	3	4	1	2	2	3	5	1	3	1	3	3
269	55	2	6	3	2	1	6		50	2	1	3	2		1	4	3	1		3			1	3	1	1	3	2	2	1		1	3	3	3	3	3	3	4	1	2	1	3	4	1	2	2	2	3
270	32	2	6	3	2	1	6		10	2	1	2	3	1	1	4	1	3		1			1	3	1	2		2	2	1		1	2	3	3	1	3	3	4	1	2	2	2	4	2	2	2	2	4
[truncated: 12 more columns]

## Sheet: Sheet2
Sex		Caste		Education status		M_status		Religion		Occupation			Q11			Q13.types of wastes			Q16
1	M	1	Dalit			1	Unmarried	1	Hindu	1	unemployed	1	To control environmental pollution			1	General	1	seperating waste into degradable and non degradable
2	F	2	Disadvantaged Janajatis			2	Married	2	Buddhist	2	business	2	For healthy life/prevent disease transmission/prevent epidemic			2	Infectious	2	Color coding and labeling in different bins
		3	Disadvantaged Non-dalit Terai caste			3	Divorce	3	Christian	3	private	3	To prevent from injuries and harzardous chemicals			3	Pathological	3	segregation of waste at source/infectious and non infectious
		4	Religious Minorities			4	seperated	4	Muslims	4	govt	4	To reduce foul smell produced from healthcare waste			4	Sharps	4	Before disposing waste
		5	Relatively advantaged Janajatis			5	Widower	5	others	5	labour	5	To prevent animals from bringing waste to community			5	Pharmaceutical
		6	Upper caste groups						donot follow any one	6	house maker					6	Genotoxic
									Mixed	7	Student					7	Chemical
							Q16			Q20 8	Electrician/student/agriculture/driving/hair saloon/self employed/freelancer			Q45		8	Waste with high content of heavy metal
			Occupation Score			1	Segregating waste into risk and non risk waste		1	Healthcare waste is more harmful/pollute the environment						9	Pressurized containers
			Profession 10			2	Different color coded labelled bins		2	Hospital acquired infection/injurious/toxic						10	Radioactive
			Semi-Profession 6						3	Healthcare wastes are nondegradable types
			Clerical, Shop-owner, Farmer 5						4	Foul smell from healthcare waste										Q48
			Skilled worker 4						5	Healthcare wastes are very difficult to manage									1	communicable diseases/diarohhea
			Semi-skilled worker 3						6	Mainly hospital waste can be recycled									2	viral fever/cough and cold/flu
			Unskilled worker 2				Hos types					Q14 infectious							3	Foul smell from hospital
			Unemployed 1				1	Public			1	Needles/injections/cannula/syringe				Q50			4	water pollution from the chemicals of hospital
							2	Private			2	Medicines			1	Regarding air pollution from incinerator			5	difficulty in breathing/respiratory problem
			Q18								3	blood/body fluid/lab waste/chemicals			2	Regarding foul smelling			6	cancer
			others			>50	years (local)				4	sharps			3	Regarding improper disposal of waste/human body parts			7	others
			dumping site					1	Kanti		5	gloves/masks			4	Open burning of healthcare waste				headache
			incineration					2	Teaching		6	food waste/degradable			5	Noise pollution				animals like dogs bring waste form hospital
			sterilization/autoclave/chemical disinfection					3	Maternity		7	plastics/paper			6	Water pollution				irritation
			reuse/recycle					4	OM		8	dust/dirt			7	Dumping waste outside compound				air pollution
			energy production					5	Kist		9	all types								chemical hazards
								6	KMC											health effects may be seen in long run
																				disturbance/noise pollution
